# Supplementary material for: Osmium(vi) nitride triggers mitochondria-induced oncosis and apoptosis
Source: Royal Society of Chemistry journal article supplement (doi:10.1039/d1cc05148b), 2022-01-01
Supplement: d1cc05148b2.pdf [file d1cc05148b2.pdf]

# A Tetradentate Osmium(VI) Nitride Triggers Mitochondria-induced Oncosis and Apoptosis in Liver Cancer Cells

## Original data of Western blotting

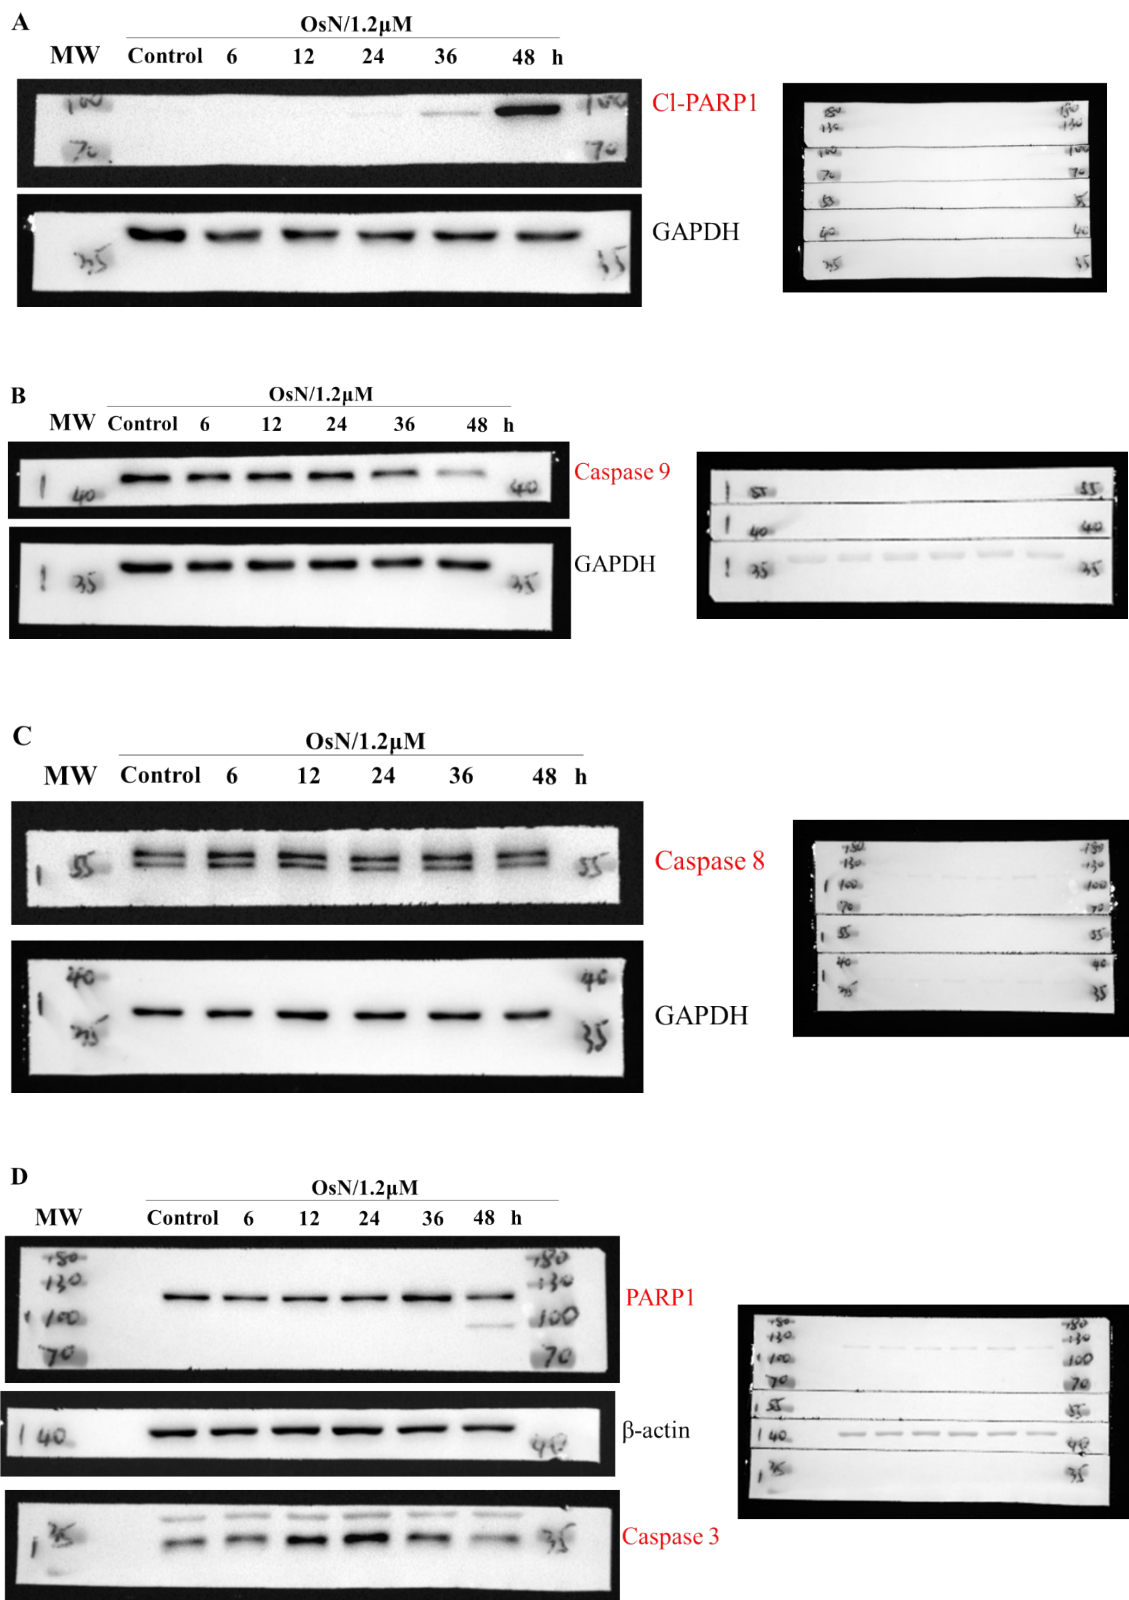

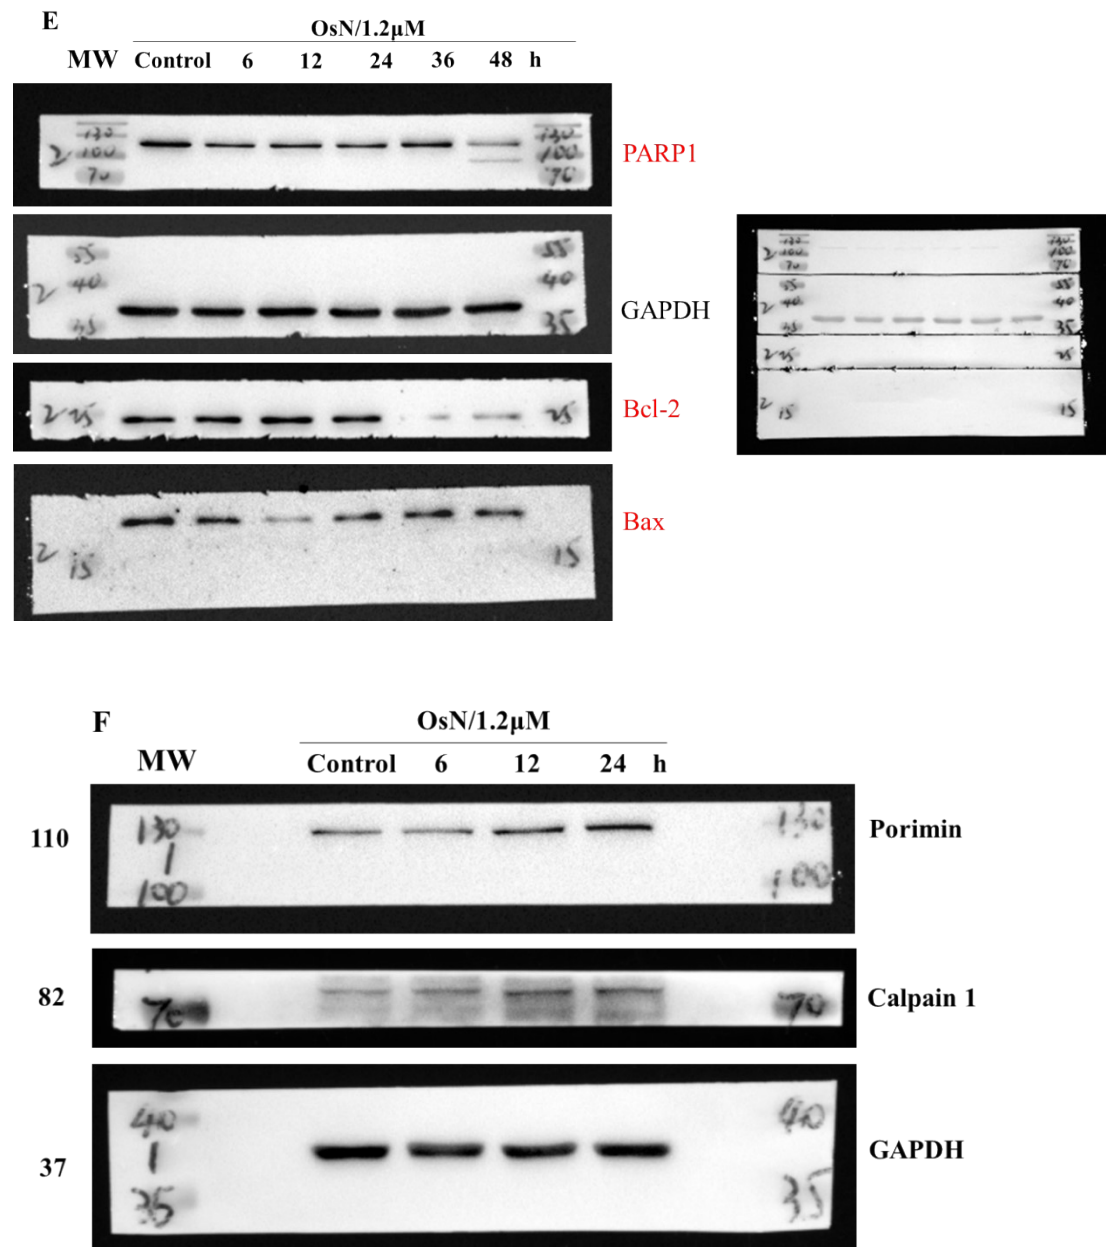

**Supplementary Figure S1.** Unprocessed original membranes of Western blotting shown in Figure 3. (A) CI-PARP1 (B) Caspase 9 (C) Caspase 8 (D) Caspase 3 and PARP1 (E) PARP1, Bcl-2 and Bax (F) Porimin, calpain 1 protein expression levels. MW: molecular weight ladder. According to the molecular weight of protein, the shown blots are cropped from different parts of the same gel, as explicit by using clear delineation with dividing lines and white space.
